# Supplementary material for: Chronic Oxidative Stress Promotes Molecular Changes Associated with Epithelial Mesenchymal Transition, NRF2, and Breast Cancer Stem Cell Phenotype
Source: MDPI journal article supplement (doi:10.3390/antiox8120633), 2019-12-11
Supplement: s1 [file s1]

## Materials and Methods

### Dot-blot

Collagen I solution was prepared and mixed with 4-hydroxy-2-nonenal (HNE) in concentrations 1  $\mu\text{M}$ , 5  $\mu\text{M}$ , 10  $\mu\text{M}$ , 25  $\mu\text{M}$ , 50  $\mu\text{M}$ , 75  $\mu\text{M}$ , and 100  $\mu\text{M}$  according to coating protocol and was left to bind for an hour at room temperature. Following incubation, 100  $\mu\text{L}$  of each mixture was loaded on the nitrocellulose membrane (Bio-Rad Laboratories, Hercules, CA, USA) and washed twice with PBS before the addition of the blocking solution, 2% (*w/v*) nonfat dry milk (Bio-Rad Laboratories, Hercules, CA, USA) in PBS for an hour. The membrane was then incubated with monoclonal mouse anti-HNE-histidine antibody (1:100; clone HNE 1g4, a generous gift of prof. G. Waeg) overnight at room temperature. After incubation with secondary antibody (1:25; EnVision, Dako), immunoreactive bands were visualized using the 3, 3'-diaminobenzidine (DAB; Dako).

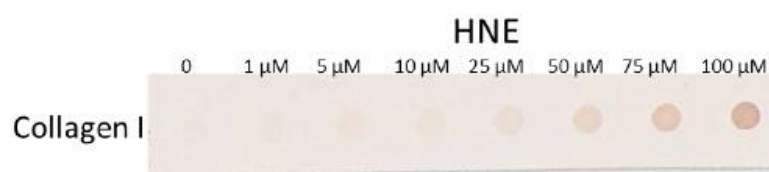

**Figure S1.** Dot blot of 4-hydroxy-2-nonenal (HNE)-collagen I conjugates.
